# Supplementary material for: Genotypic Diversity of Ciprofloxacin Nonsusceptibility and Its Relationship with Minimum Inhibitory Concentrations in Nontyphoidal Salmonella Clinical Isolates in Taiwan
Source: MDPI journal article supplement (doi:10.3390/antibiotics10111383), 2021-11-11
Supplement: s1 [file s1]

**Table S1.** Mutational profiles of *gyrA*, *gyrB*, *parC*, and *parE* related to CIP resistance

| No. | Gene        | Mutational site         | Mutant construction or restoration | Origin             | Reference                                                                   |
|-----|-------------|-------------------------|------------------------------------|--------------------|-----------------------------------------------------------------------------|
| 1   | <i>gyrA</i> | Ser83Phe                | No                                 | <i>Salmonella</i>  | Reyna F, et al. Antimicrob Agents Chemother, 1995. 39(7):1621-3. [39]       |
| 2   | <i>gyrA</i> | Ser83Phe                | Yes                                | <i>Salmonella</i>  | Turner AK, et al. J Antimicrob Chemother, 2006. 58(4):733-40. [40]          |
| 3   | <i>gyrA</i> | Ser83Tyr                | No                                 | <i>Salmonella</i>  | Reyna F, et al. Antimicrob Agents Chemother, 1995. 39(7):1621-3. [39]       |
| 4   | <i>gyrA</i> | Ser83Tyr                | Yes                                | <i>Salmonella</i>  | Turner AK, et al. J Antimicrob Chemother, 2006. 58(4):733-40. [40]          |
| 5   | <i>gyrA</i> | Ser83Ala                | Yes                                | <i>E. coli</i>     | Barnard FM, et al. Antimicrob Agents Chemother, 2001. 45(7):1994-2000. [41] |
| 6   | <i>gyrA</i> | Ser83Leu                | No                                 | <i>E. coli</i>     | Cesaro A, et al. J Antimicrob Chemother, 2008. 61(5):1007-15. [42]          |
| 7   | <i>gyrA</i> | Ser83stop               | No                                 | <i>E. coli</i>     | Cesaro A, et al. J Antimicrob Chemother, 2008. 61(5):1007-15. [42]          |
| 8   | <i>gyrA</i> | Asp87Tyr                | No                                 | <i>Salmonella</i>  | Reyna F, et al. Antimicrob Agents Chemother, 1995. 39(7):1621-3. [39]       |
| 9   | <i>gyrA</i> | Asp87Tyr                | Yes                                | <i>Salmonella</i>  | Turner AK, et al. J Antimicrob Chemother, 2006. 58(4):733-40. [40]          |
| 10  | <i>gyrA</i> | Asp87Asn                | No                                 | <i>Salmonella</i>  | Reyna F, et al. Antimicrob Agents Chemother, 1995. 39(7):1621-3. [39]       |
| 11  | <i>gyrA</i> | Asp87Asn                | Yes                                | <i>Salmonella</i>  | Turner AK, et al. J Antimicrob Chemother, 2006. 58(4):733-40. [40]          |
| 12  | <i>gyrA</i> | Asp87Ala                | Yes                                | <i>E. coli</i>     | Barnard FM, et al. Antimicrob Agents Chemother, 2001. 45(7):1994-2000. [41] |
| 13  | <i>gyrA</i> | Asp87Gly                | No                                 | <i>Salmonella</i>  | Lin CC, et al. J Food Prot, 2009. 72(1):14-20. [43]                         |
| 14  | <i>gyrA</i> | Asp87Gly                | No                                 | <i>Pseudomonas</i> | Yonezawa M, et al. Antimicrob Agents Chemother, 1995. 39(9):1970-2. [44]    |
| 15  | <i>gyrA</i> | Ala67Pro+Gly 81Ser      | No                                 | <i>Salmonella</i>  | Reyna F, et al. Antimicrob Agents Chemother, 1995. 39(7):1621-3. [39]       |
| 16  | <i>gyrA</i> | Asp82Asn                | No                                 | <i>E. coli</i>     | Cesaro A, et al. J Antimicrob Chemother, 2008. 61(5):1007-15. [42]          |
| 17  | <i>gyrB</i> | Glu466Asp               | Yes                                | <i>Salmonella</i>  | Al-Emran HM, et al. Clin Infect Dis, 2016. 62 Suppl 1:S47-9. [45]           |
| 18  | <i>gyrB</i> | Insertion of Glu at 465 | No                                 | <i>E. coli</i>     | Cesaro A, et al. J Antimicrob Chemother, 2008. 61(5):1007-15. [42]          |
| 19  | <i>gyrB</i> | Tyr420Cys               | No                                 | <i>Salmonella</i>  | Eaves DJ, et al. Antimicrob Agents Chemother, 2004. 48(10):4012-4015. [46]  |
| 20  | <i>gyrB</i> | Arg437Leu               | No                                 | <i>Salmonella</i>  | Eaves DJ, et al. Antimicrob Agents Chemother, 2004. 48(10):4012-4015. [46]  |
| 21  | <i>parC</i> | Thr57Ser                | No                                 | <i>Salmonella</i>  | Eaves DJ, et al. Antimicrob Agents Chemother, 2004. 48(10):4012-4015. [46]  |

|    |             |           |                                           |                         |                                                                            |
|----|-------------|-----------|-------------------------------------------|-------------------------|----------------------------------------------------------------------------|
| 22 | <i>parC</i> | Thr66Ile  | No                                        | <i>Salmonella</i>       | Eaves DJ, et al. Antimicrob Agents Chemother, 2004. 48(10):4012-4015. [46] |
| 23 | <i>parC</i> | Ser80Arg  | No                                        | <i>Salmonella</i>       | Ling JM, et al. Antimicrob Agents Chemother, 2003. 47(11):3567-73. [27]    |
| 24 | <i>parC</i> | Ser80Ile  | No                                        | <i>E. coli</i>          | Saenz Y, et al. J Antimicrob Chemother, 2003. 51(4):1001-5. [47]           |
| 25 | <i>parC</i> | Glu84Gly  | No                                        | <i>E. coli</i>          | Saenz Y, et al. J Antimicrob Chemother, 2003. 51(4):1001-5. [47]           |
| 26 | <i>parC</i> | Glu84Lys  | Yes                                       | <i>Salmonella</i>       | Turner AK, et al. J Antimicrob Chemother, 2006. 58(4):733-40. [40]         |
| 27 | <i>parE</i> | Glu453Gly | No                                        | <i>Salmonella</i>       | Eaves DJ, et al. Antimicrob Agents Chemother, 2004. 48(10):4012-4015. [46] |
| 28 | <i>parE</i> | Ala498Thr | No                                        | <i>Salmonella</i>       | Eaves DJ, et al. Antimicrob Agents Chemother, 2004. 48(10):4012-4015. [46] |
| 29 | <i>parE</i> | Val512Gly | No                                        | <i>Salmonella</i>       | Eaves DJ, et al. Antimicrob Agents Chemother, 2004. 48(10):4012-4015. [46] |
| 30 | <i>parE</i> | Ser518Cys | No                                        | <i>Salmonella</i>       | Eaves DJ, et al. Antimicrob Agents Chemother, 2004. 48(10):4012-4015. [46] |
| 31 | <i>parE</i> | Ser458Pro | No                                        | <i>Salmonella</i>       | Ling JM, et al. Antimicrob Agents Chemother, 2003. 47(11):3567-73. [27]    |
| 32 | <i>parE</i> | Val461Gly | Yes<br>(no <i>Salmonella</i><br>function) | (no <i>Salmonella</i> ) | O'Regan E, et al. Antimicrob Agents Chemother, 2009. 53(3):1080-7. [48]    |

---
