# Supplementary material for: Genotypic Diversity of Ciprofloxacin Nonsusceptibility and Its Relationship with Minimum Inhibitory Concentrations in Nontyphoidal Salmonella Clinical Isolates in Taiwan
Source: MDPI journal article supplement (doi:10.3390/antibiotics10111383), 2021-11-11
Supplement: s1 [file s1]

**Table S3.** Sequences of primer pairs for PCR amplicons for the four QRDR genes *gyrA*, *gyrB*, *parC*, and *parE* (A) and PCR detection of the 13 reported PMQR genes (B)

| Gene                 | Forward (5'→3')          | Reverse (5'→3')         | PCR product (bp) |
|----------------------|--------------------------|-------------------------|------------------|
| <b>A. QRDR</b>       |                          |                         |                  |
| <i>gyrA</i>          | CTGGATTATGCGATGTCGGTCAT  | TAGAACCGAAGTTACCCTGACCA | 271              |
| <i>gyrB</i>          | CCCGTGAAATGACCCGTCGTAAA  | ACGCTCGACAATTTCCGGCATCT | 410              |
| <i>parC</i>          | TCATGGATCGTGCGTTG        | GCGAATGACTTCGGATCA      | 271              |
| <i>parE</i>          | CGCTGCGCTTATGTGCT        | CAGTACGCCCCGCCTTCT      | 702              |
| <b>B. PMQR</b>       |                          |                         |                  |
| <i>aac(6')-Ib-cr</i> | GGTATGCCCAGTCGTACGTT     | AACCATGTACACGGCTGGA     | 295              |
| <i>oqxA</i>          | CTCGGCGCGATGATGCT        | CCACTCTTCACGGGAGACGA    | 392              |
| <i>oqxB</i>          | TTCTCCCCCGGCGGGAAGTAC    | CTCGGCCATTTTGGCGCGTA    | 512              |
| <i>qepA</i>          | CGGCACGTTGAGCCAGAA       | TGGATCGCCGCGTTTT        | 102              |
| <i>qnrA</i>          | ATCCAGATCGGCAAAGGTTA     | GATAAAGTTTTTCAGCAAGAGG  | 543              |
| <i>qnrB</i>          | ATCGCGAAAGTCAGAAAGG      | CTTGCACCGCGAAAATCTG     | 160              |
| <i>qnrC</i>          | GCAGAATTCAGGGGTGTGAT     | AACTGCTCCAAAAGCTGCTC    | 118              |
| <i>qnrD</i>          | AGGAATAGCTTGGAAGGGTG     | CCTAAGGCGCTAATGTTT      | 107              |
| <i>qnrS</i>          | ACTTAAGTCGAGGTGTTT       | CAATTTTGATACCTGATG      | 126              |
| <i>qnrAS</i>         | TGCGCCACGAGAAAGGTC       | AACGCCTATGTATCGAGAAATG  | 101              |
| <i>qnrSM</i>         | TACACCGGCCAGAAAGTGGTCTGA | TCCTTCAGCGTGCGGCCATTGAA | 140              |
| <i>qnrVP</i>         | TGTATGTTGGCGATGAGC       | GGTGTACTGACGCGATTA      | 120              |
| <i>qnrVV</i>         | GCAGACTGTTTCGGCATTG      | TGATGTAGGCGGAGCAAA      | 115              |
