# Supplementary material for: Genotypic Diversity of Ciprofloxacin Nonsusceptibility and Its Relationship with Minimum Inhibitory Concentrations in Nontyphoidal Salmonella Clinical Isolates in Taiwan
Source: MDPI journal article supplement (doi:10.3390/antibiotics10111383), 2021-11-11
Supplement: s1 [file s1]

**Table S2.** Distribution of QRDR mutations and PMQR genes in the 39 CIP-nonsusceptible NTS isolates

| Isolate ID | Both QRDR mutations(s)<br>and PMQR gene(s) | QRDR<br>mutation(s) only | Any QRDR<br>mutation(s) | PMQR<br>gene(s) only | Any PMQR<br>gene(s) | Neither QRDR mutation<br>nor PMQR gene |
|------------|--------------------------------------------|--------------------------|-------------------------|----------------------|---------------------|----------------------------------------|
| C01        | –                                          | +                        | +                       | –                    | –                   | –                                      |
| C02        | –                                          | +                        | +                       | –                    | –                   | –                                      |
| C03        | –                                          | +                        | +                       | –                    | –                   | –                                      |
| C04        | –                                          | +                        | +                       | –                    | –                   | –                                      |
| C05        | –                                          | +                        | +                       | –                    | –                   | –                                      |
| C06        | –                                          | +                        | +                       | –                    | –                   | –                                      |
| C07        | –                                          | +                        | +                       | –                    | –                   | –                                      |
| C08        | +                                          | –                        | +                       | –                    | +                   | –                                      |
| C09        | +                                          | –                        | +                       | –                    | +                   | –                                      |
| C10        | +                                          | –                        | +                       | –                    | +                   | –                                      |
| C11        | –                                          | +                        | +                       | –                    | –                   | –                                      |
| C12        | –                                          | +                        | +                       | –                    | –                   | –                                      |
| C13        | +                                          | –                        | +                       | –                    | +                   | –                                      |
| C14        | +                                          | –                        | +                       | –                    | +                   | –                                      |
| C15        | –                                          | +                        | +                       | –                    | –                   | –                                      |
| C16        | –                                          | +                        | +                       | –                    | –                   | –                                      |
| C17        | +                                          | –                        | +                       | –                    | +                   | –                                      |
| C18        | –                                          | +                        | +                       | –                    | –                   | –                                      |
| C19        | –                                          | +                        | +                       | –                    | –                   | –                                      |
| C20        | +                                          | –                        | +                       | –                    | +                   | –                                      |
| C21        | –                                          | +                        | +                       | –                    | –                   | –                                      |
| C22        | –                                          | +                        | +                       | –                    | –                   | –                                      |
| C23        | +                                          | –                        | +                       | –                    | +                   | –                                      |
| C24        | –                                          | +                        | +                       | –                    | –                   | –                                      |
| C25        | –                                          | +                        | +                       | –                    | –                   | –                                      |
| C26        | –                                          | –                        | –                       | +                    | +                   | –                                      |
| C27        | –                                          | –                        | –                       | +                    | +                   | –                                      |
| C28        | –                                          | +                        | +                       | –                    | –                   | –                                      |
| C29        | +                                          | –                        | +                       | –                    | +                   | –                                      |
| C30        | –                                          | –                        | –                       | +                    | +                   | –                                      |
| C31        | –                                          | +                        | +                       | –                    |                     | –                                      |
| C32        | –                                          | –                        | –                       | +                    | +                   | –                                      |
| C33        | +                                          | –                        | +                       | –                    | +                   | –                                      |
| C34        | –                                          | –                        | –                       | +                    | +                   | –                                      |
| C35        | +                                          | –                        | +                       | –                    | +                   | –                                      |
| C36        | –                                          | –                        | –                       | +                    | +                   | –                                      |
| C37        | –                                          | +                        | +                       | –                    | –                   | –                                      |
| C38        | +                                          | –                        | +                       | –                    | +                   | –                                      |
| C39        | –                                          | +                        | +                       | –                    | –                   | –                                      |
| Total: 39  | 12                                         | 21                       | 33                      | 6                    | 18                  | 0                                      |
| Percentage | 30.8%                                      | 53.8%                    | 84.6%                   | 15.4%                | 46.2%               | 0.0%                                   |
